# Supplementary material for: Disruption of polyubiquitin gene Ubb causes dysregulation of neural stem cell differentiation with premature gliogenesis
Source: PubMed Central journal article supplement — Sci Rep. 2014 Nov 13;4:7026. doi: 10.1038/srep07026 (PMC4229674; doi:10.1038/srep07026), 2014-11-13

## **Supplementary Information**

### **Disruption of polyubiquitin gene *Ubb* causes dysregulation of neural stem cell differentiation with premature gliogenesis**

Han-Wook Ryu, Chul-Woo Park & Kwon-Yul Ryu\*

Department of Life Science, University of Seoul, Seoul 130-743, Republic of Korea

\*Correspondence to: Kwon-Yul Ryu, Department of Life Science, University of Seoul, 163 Seoulsiripdae-ro, Dongdaemun-gu, Seoul 130-743, Republic of Korea. E-mail: kyryu@uos.ac.kr.

**Figure S1.** Expression levels of various genes in embryonic brains on 14.5 dpc.

(a) *Nes*, *Fox3* (*NeuN*), and *Gfap* mRNA levels in wild-type (*Ubb*<sup>+/+</sup>) and *Ubb*<sup>-/-</sup> embryonic brains ( $n = 3$  each) on 14.5 dpc were determined by qRT-PCR and normalized to *Gapdh* levels. mRNA levels are expressed as a fold increase relative to wild-type levels. (b) *Notch1*, *Hes5*, and *Hey1* mRNA levels were determined in a similar manner as in (a). (c) *Neurog1* mRNA levels were determined in a similar manner as in (a). All data are expressed as the means  $\pm$  SEM from the indicated number of samples. \* $P < 0.05$ ; \*\* $P < 0.01$ ; \*\*\* $P < 0.001$  vs. *Ubb*<sup>+/+</sup>.

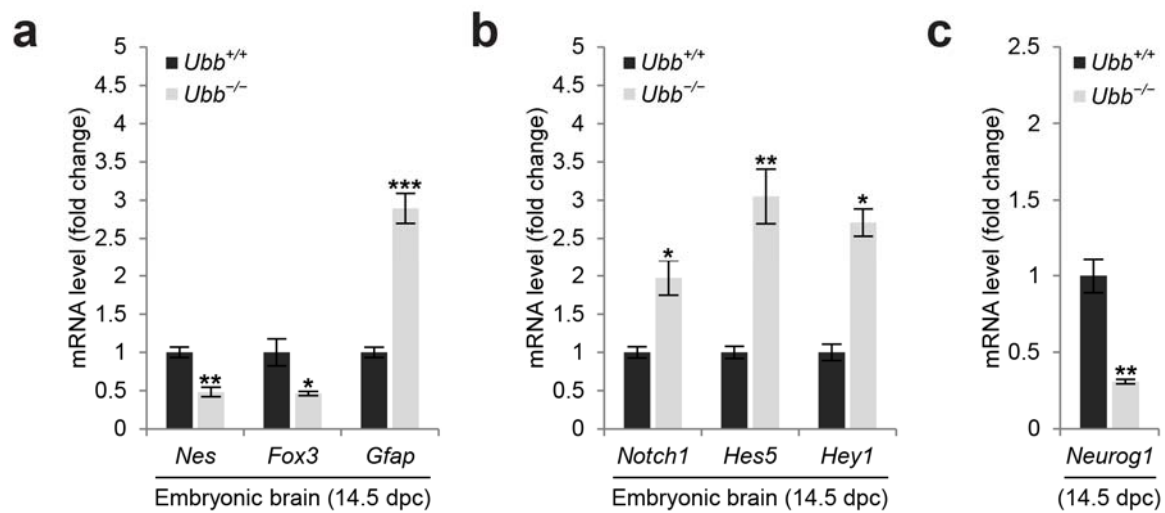

**Figure S2.** Presentation of original immunoblots.

The cropped parts of immunoblots were indicated with boxes.

Fig. 1a

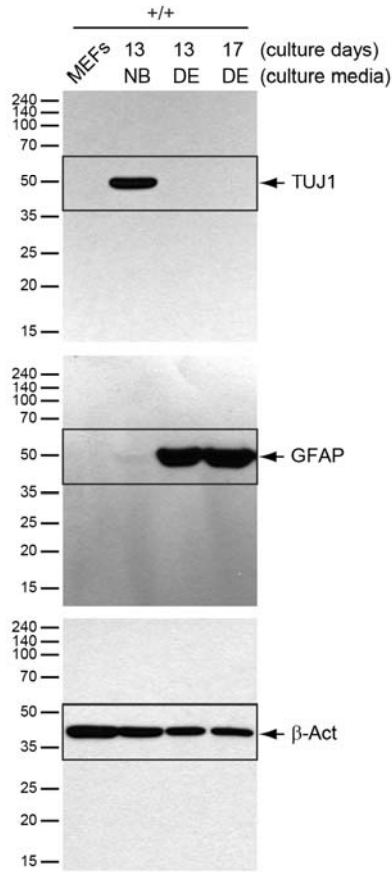

Fig. 1b

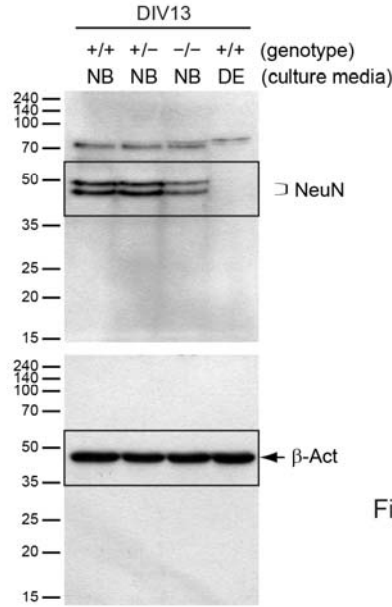

Fig. 2d

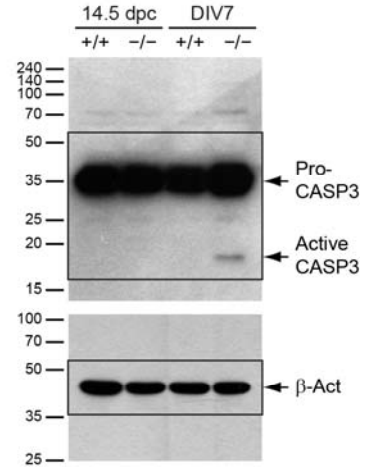

Fig. 4d

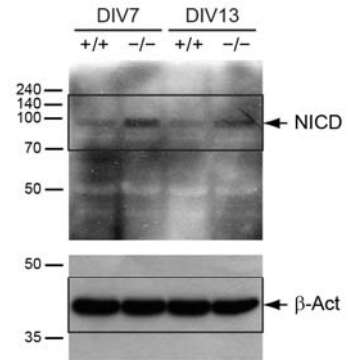

Fig. 4c

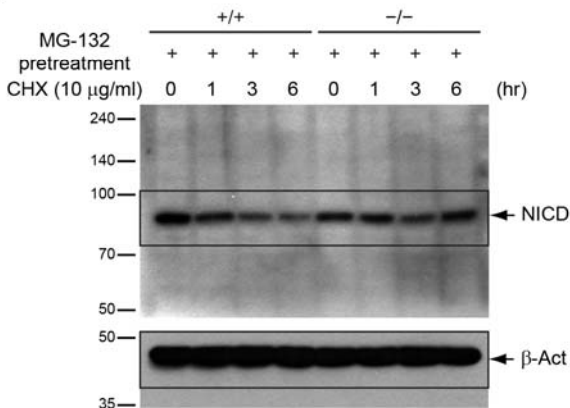

Fig. 5d

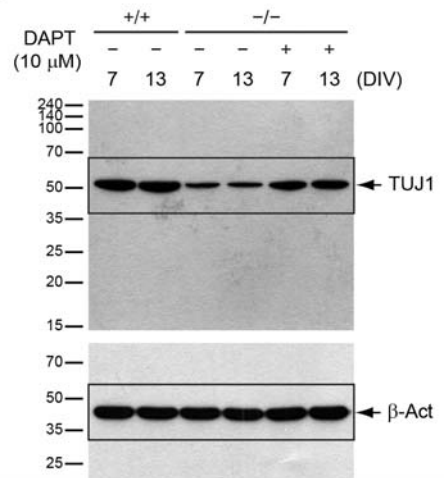

Supplement: srep07026-s1.pdf [file srep07026-s1.pdf]
